# Supplementary material for: Effect of a dairy- and calcium-rich diet on weight loss and appetite during energy restriction in overweight and obese adults: a randomized trial
Source: Springer Nature journal article supplement (doi:10.1038/ejcn.2013.52), 2013-03-06
Supplement: 41430_2013_BFejcn201352_MOESM4_ESM.pdf [file 41430_2013_BFejcn201352_MOESM4_ESM.pdf]

# Online Supporting Material

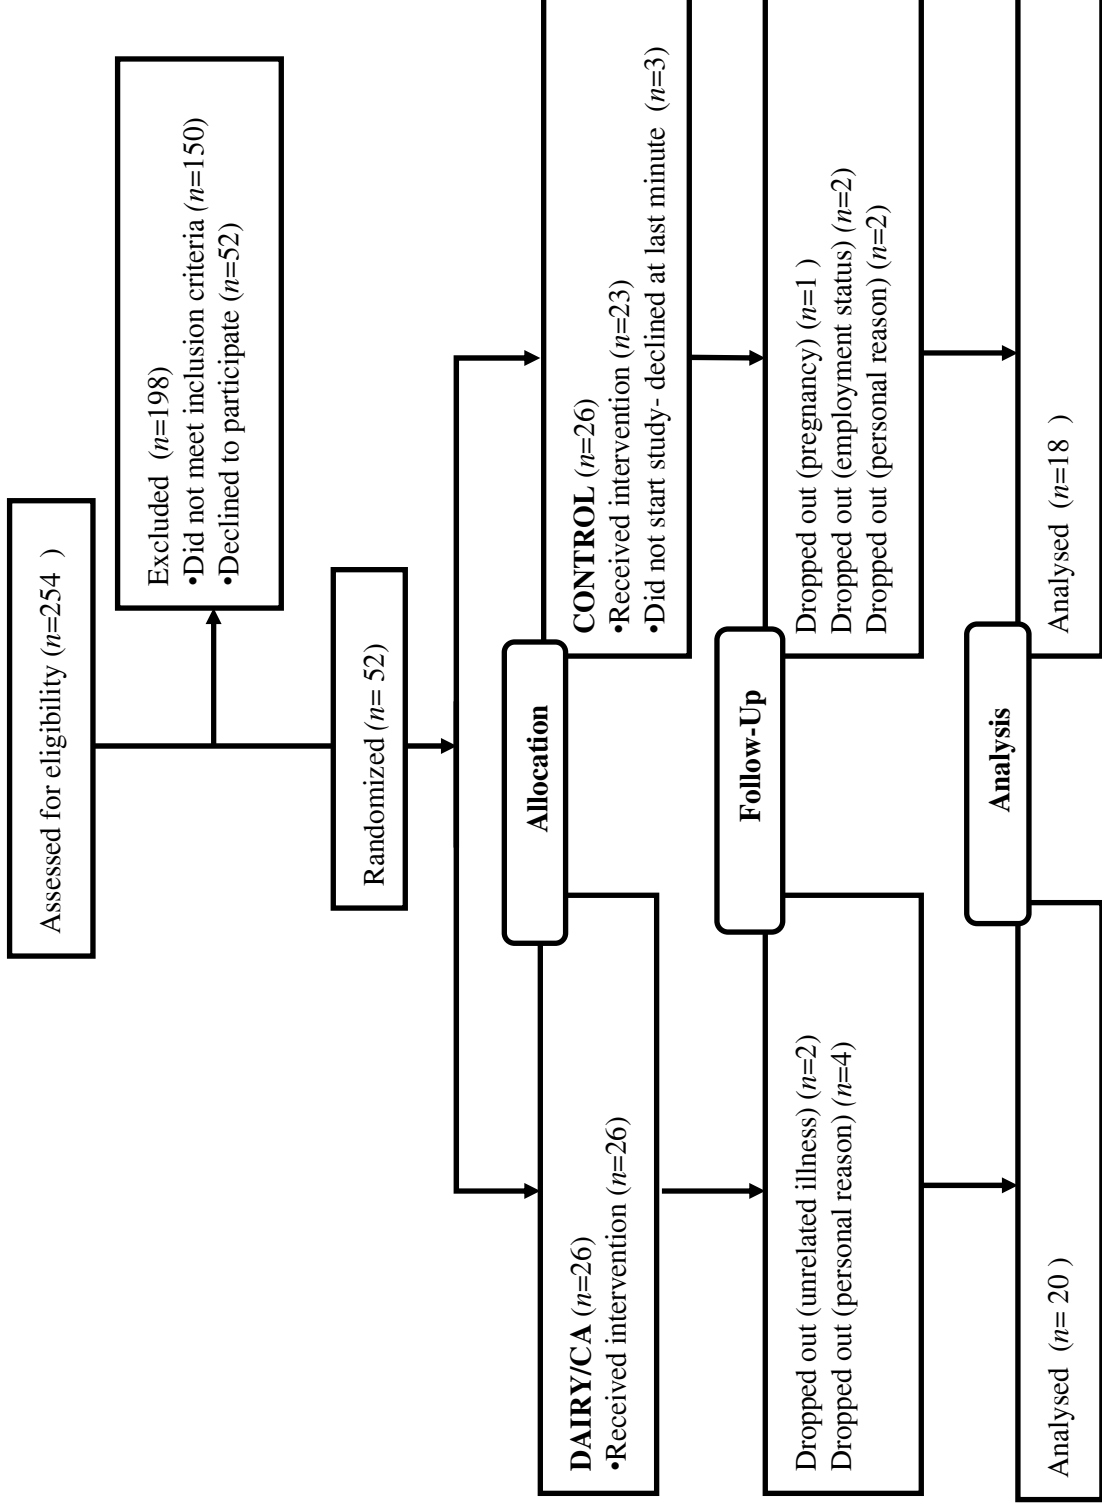

**Supplemental Figure 1.** Schematic showing participant recruitment, enrollment, allocation, and treatment as per CONSORT statement.
