# Supplementary material for: Effect of a dairy- and calcium-rich diet on weight loss and appetite during energy restriction in overweight and obese adults: a randomized trial
Source: Springer Nature journal article supplement (doi:10.1038/ejcn.2013.52), 2013-03-06
Supplement: 41430_2013_BFejcn201352_MOESM5_ESM.pdf [file 41430_2013_BFejcn201352_MOESM5_ESM.pdf]

## Online Supporting Material

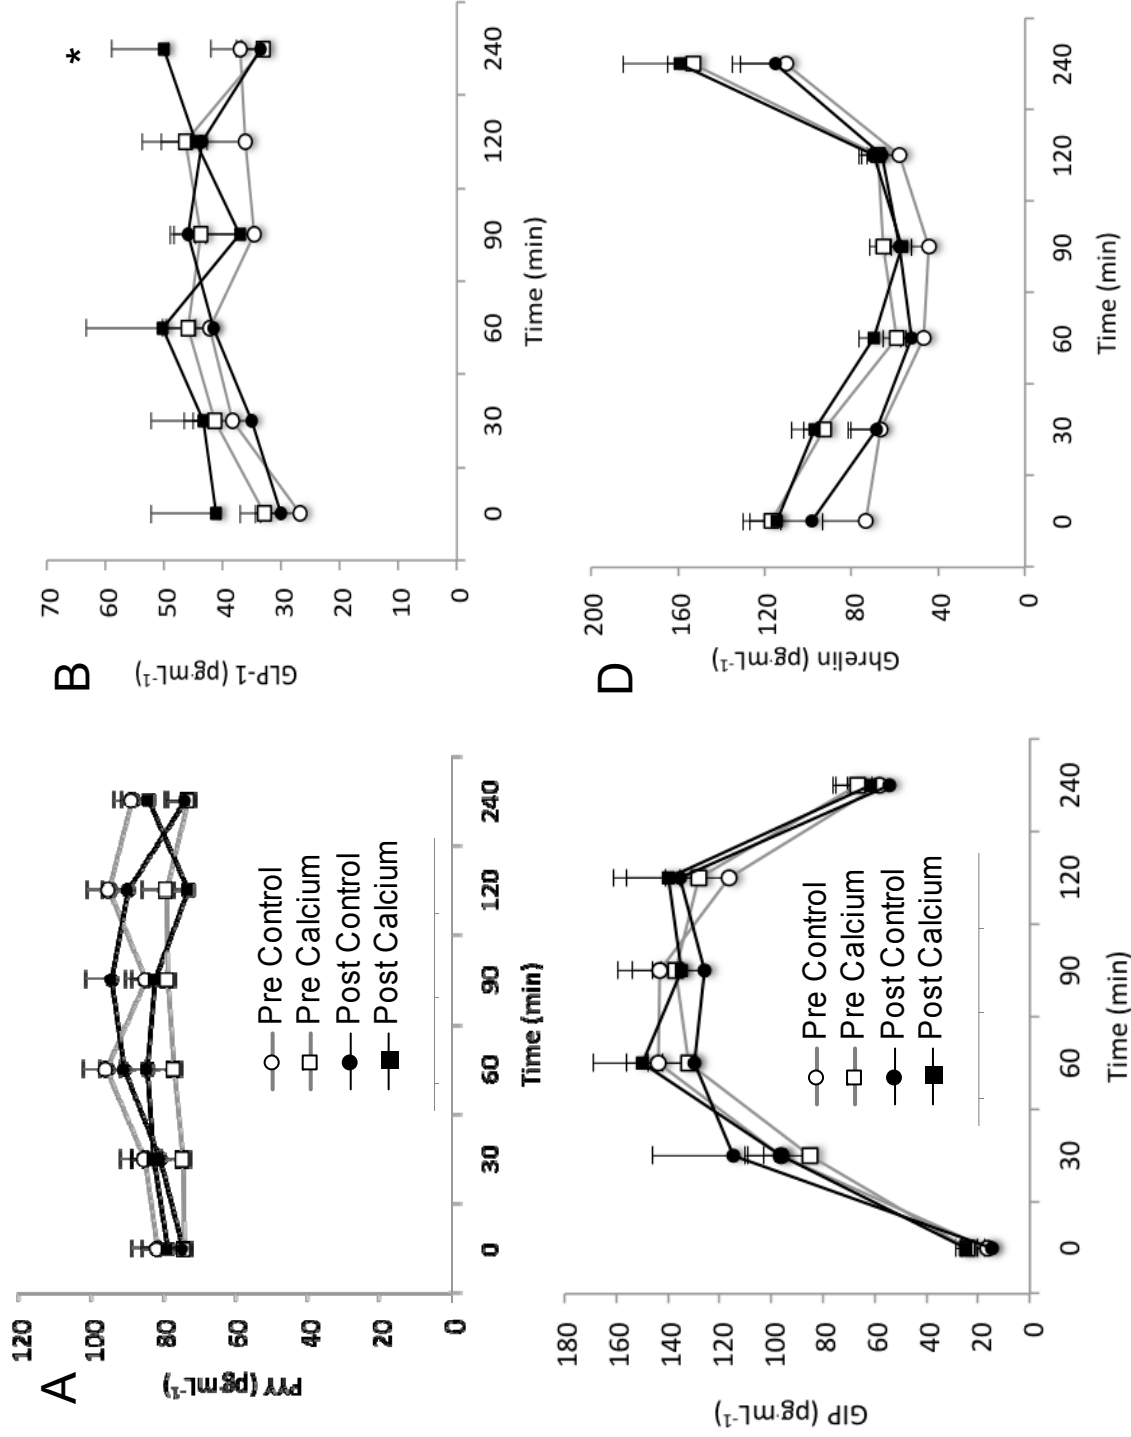

**Supplemental Figure 2.** Absolute concentrations plasma PYY (A), GLP-1 (B), GIP (C), and ghrelin (D) during a 4 h meal tolerance test in participants consuming control or dairy/Ca at wk 0 and wk 12. Values are means  $\pm$  SE,  $n=18$  (control) and  $n=20$  (dairy/Ca).  $\circ$  Control,  $\square$  Dairy/Ca. \* Different from control at indicated time point,  $P < 0.05$ .
