# Supplementary material for: Effect of a dairy- and calcium-rich diet on weight loss and appetite during energy restriction in overweight and obese adults: a randomized trial
Source: Springer Nature journal article supplement (doi:10.1038/ejcn.2013.52), 2013-03-06
Supplement: 41430_2013_BFejcn201352_MOESM6_ESM.pdf [file 41430_2013_BFejcn201352_MOESM6_ESM.pdf]

# Online Supporting Material

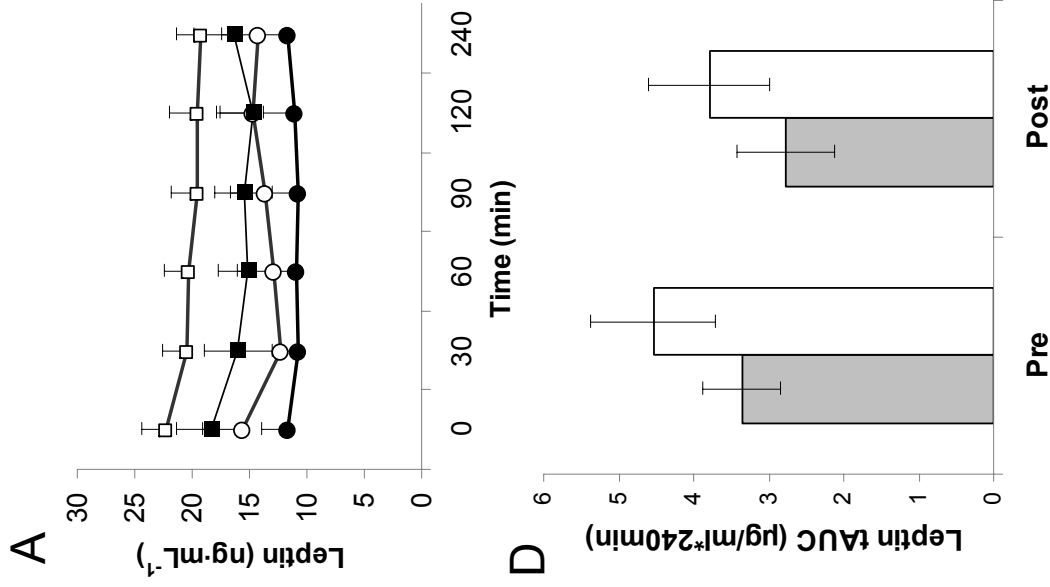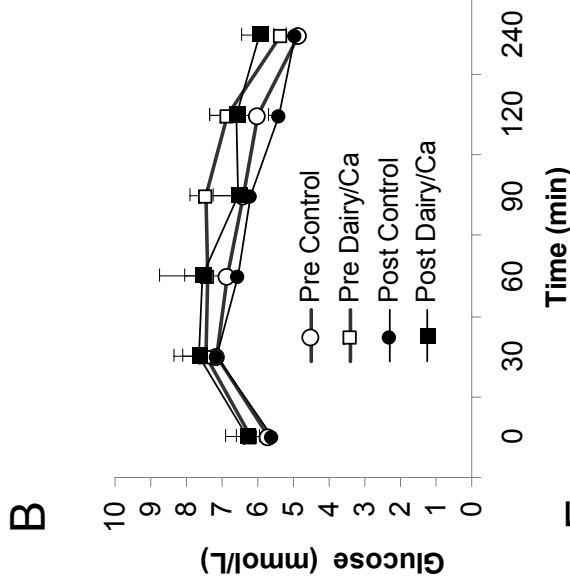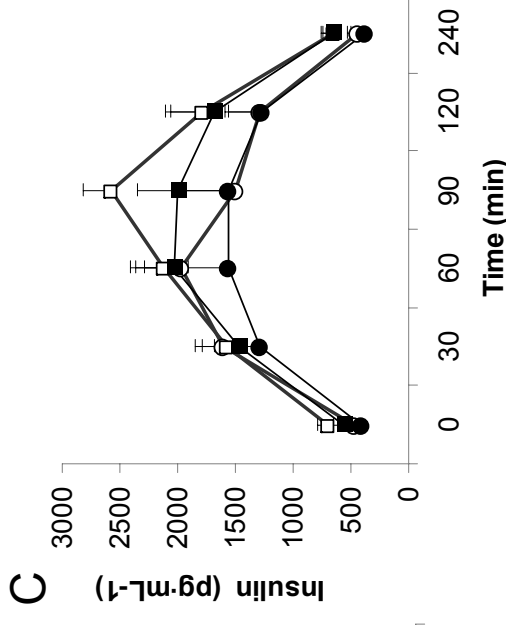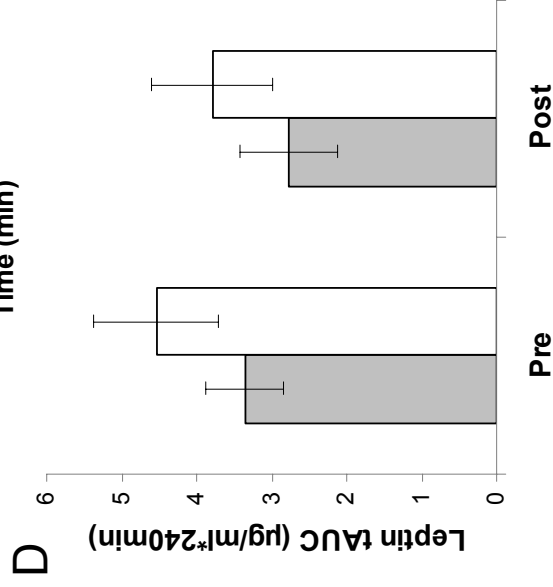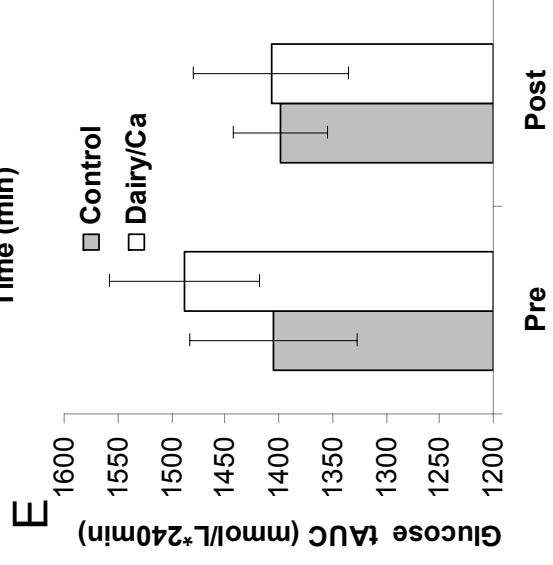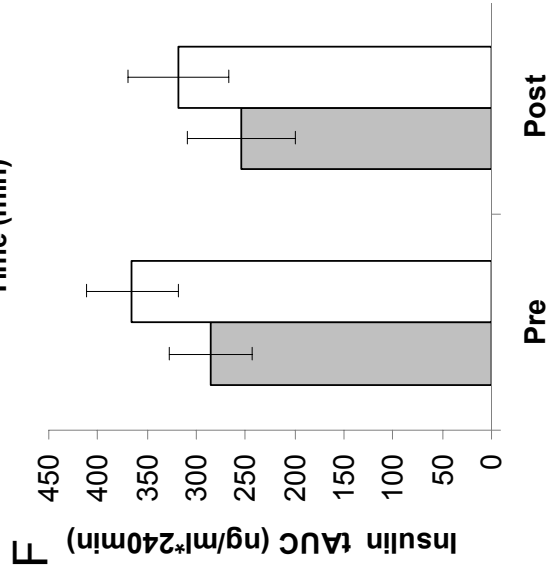

**Supplemental Figure 3.** Absolute concentrations and tAUC of plasma leptin (**A, D**), blood glucose (**B, E**), and plasma insulin (**C, F**) during a 4 h meal tolerance test in participants consuming control or calcium at wk 0 and wk 12. Values are means  $\pm$  SE,  $n=18$  (control) and  $n=20$  (dairy/Ca). ○ Control, □ Dairy/Ca.
