# Supplementary material for: Effect of a dairy- and calcium-rich diet on weight loss and appetite during energy restriction in overweight and obese adults: a randomized trial
Source: Springer Nature journal article supplement (doi:10.1038/ejcn.2013.52), 2013-03-06
Supplement: 41430_2013_BFejcn201352_MOESM7_ESM.pdf [file 41430_2013_BFejcn201352_MOESM7_ESM.pdf]

## Online Supporting Material

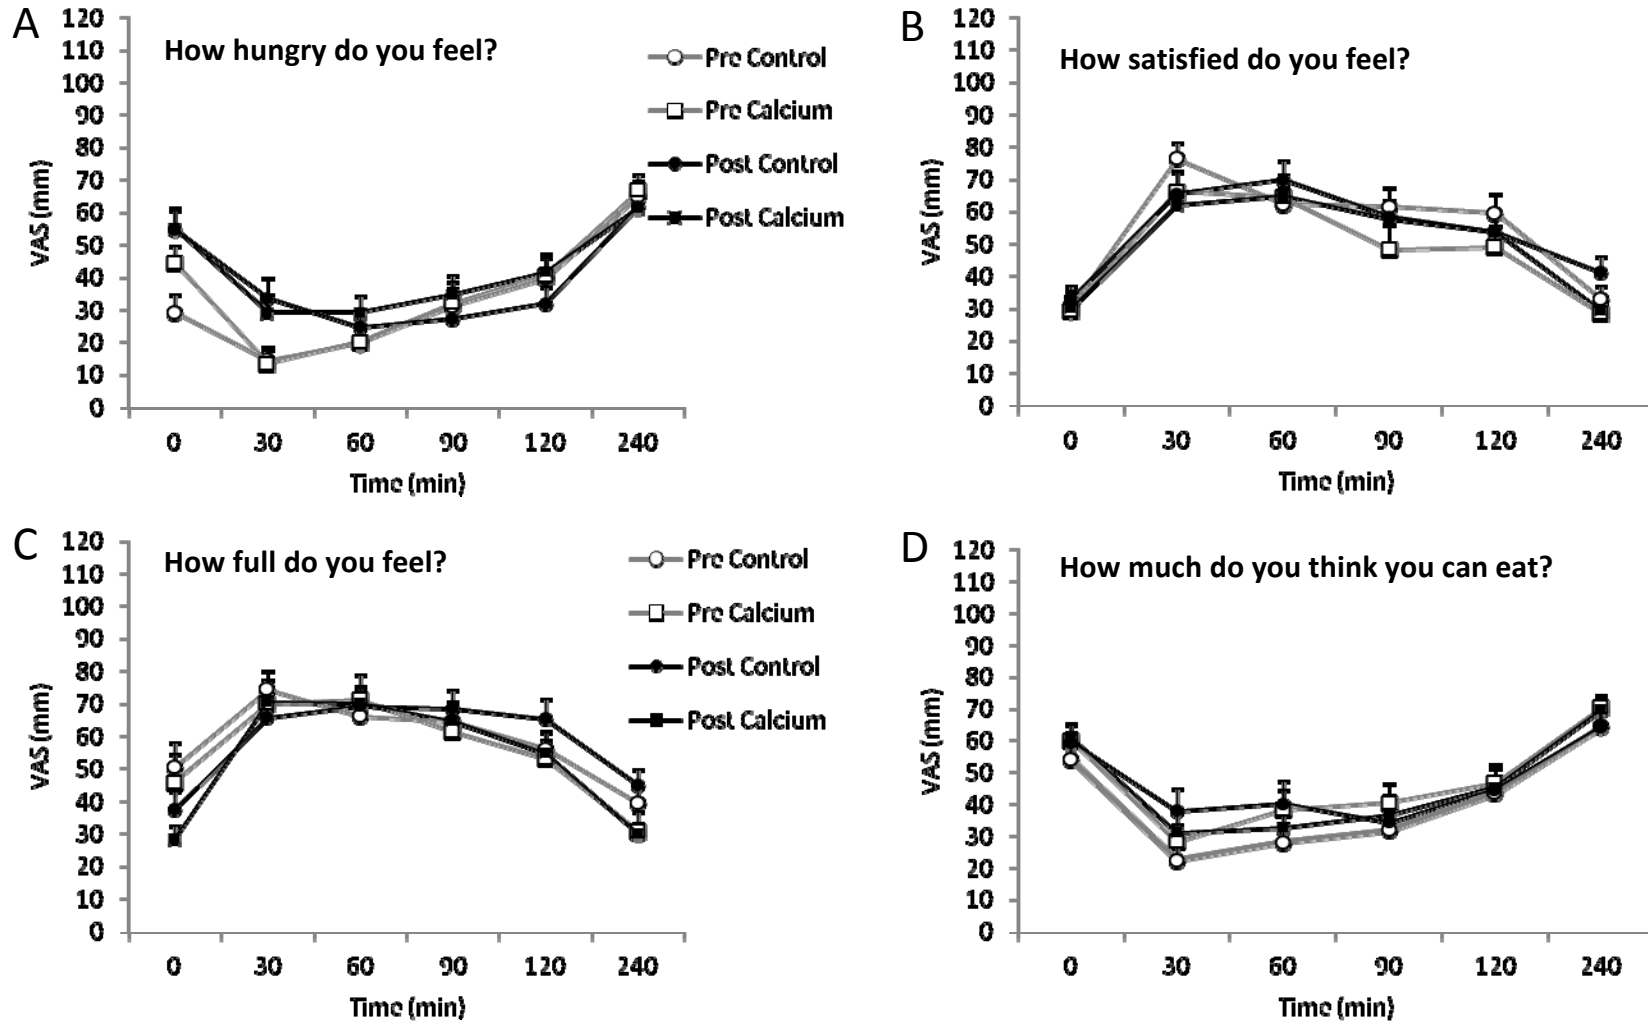

**Supplemental Figure 4.** Subjective ratings of appetite during a 4-h MTT at week 0 and week 12. Values are presented as mean  $\pm$  SE.  $\circ$  Control ( $n=18$ ),  $\square$  Calcium ( $n=20$ ).
